# Supplementary material for: Pseudomonas bijieensis Strain XL17 within the P. corrugata Subgroup Producing 2,4-Diacetylphloroglucinol and Lipopeptides Controls Bacterial Canker and Gray Mold Pathogens of Kiwifruit
Source: MDPI journal article supplement (doi:10.3390/microorganisms10020425), 2022-02-12
Supplement: s1 [file s1]

***Pseudomonas bijeensis* XL17 (JAJQKS000000000.1) 17 regions**

| Region      | Type                   | From    | To      | Most similar known cluster |                  | Similarity |
|-------------|------------------------|---------|---------|----------------------------|------------------|------------|
| Region 1.1  | NRPS                   | 1       | 38,341  | pyoverdin                  | NRP              | 11%        |
| Region 2.1  | RiPP-like              | 161,167 | 170,284 |                            |                  |            |
| Region 2.2  | RiPP-like              | 868,157 | 878,981 |                            |                  |            |
| Region 2.3  | betalactone            | 892,282 | 915,516 | fengycin                   | NRP              | 13%        |
| Region 3.1  | NRPS                   | 426,734 | 479,720 | pyoverdin                  | NRP              | 10%        |
| Region 3.2  | NAGGN                  | 605,603 | 620,493 |                            |                  |            |
| Region 4.1  | RiPP-like              | 576,980 | 587,849 |                            |                  |            |
| Region 5.1  | NRPS                   | 116,926 | 182,967 | entolysin                  | NRP              | 8%         |
| Region 5.2  | butyrolactone          | 604,105 | 617,524 |                            |                  |            |
| Region 5.3  | NRPS                   | 628,486 | 668,230 | crochelin A                | NRP + Polyketide | 7%         |
| Region 7.1  | arylpolyene            | 265,837 | 309,448 | APE Vf                     | Other            | 40%        |
| Region 10.1 | NRPS                   | 1       | 36,186  |                            |                  |            |
| Region 10.2 | T3PKS                  | 85,829  | 126,917 | 2,4-diacetylphloroglucinol | Polyketide       | 100%       |
| Region 13.1 | lanthipeptide-class-ii | 85,406  | 108,480 |                            |                  |            |
| Region 14.1 | redox-cofactor         | 27,809  | 49,974  | lankacidin C               | NRP + Polyketide | 13%        |
| Region 17.1 | NRPS-like              | 28,708  | 64,947  | fragin                     | NRP              | 37%        |
| Region 20.1 | NRPS                   | 1       | 29,241  | pyoverdin                  | NRP              | 10%        |

***Pseudomonas bijeensis* L22-9<sup>T</sup> (CP048810.1) 15 regions**

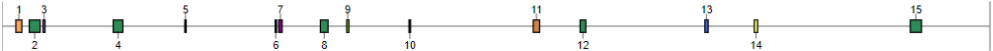

| Region    | Type                   | From      | To        | Most similar known cluster |                  | Similarity |
|-----------|------------------------|-----------|-----------|----------------------------|------------------|------------|
| Region 1  | T3PKS                  | 94,261    | 135,310   | 2,4-diacetylphloroglucinol | Polyketide       | 100%       |
| Region 2  | NRPS                   | 185,776   | 259,864   | crochelin A                | NRP + Polyketide | 7%         |
| Region 3  | butyrolactone          | 279,602   | 293,021   |                            |                  |            |
| Region 4  | NRPS                   | 757,542   | 823,598   | syringomycin               | NRP              | 17%        |
| Region 5  | RiPP-like              | 1,245,173 | 1,254,394 |                            |                  |            |
| Region 6  | RiPP-like              | 1,861,034 | 1,870,319 |                            |                  |            |
| Region 7  | betalactone            | 1,885,193 | 1,908,427 | fengycin                   | NRP              | 13%        |
| Region 8  | NRPS                   | 2,168,914 | 2,221,105 | pyoverdin                  | NRP              | 10%        |
| Region 9  | NAGGN                  | 2,348,114 | 2,363,004 |                            |                  |            |
| Region 10 | RiPP-like              | 2,772,377 | 2,783,246 |                            |                  |            |
| Region 11 | arylpolyene            | 3,618,892 | 3,662,503 | APE Vf                     | Other            | 40%        |
| Region 12 | NRPS-like              | 3,938,199 | 3,976,983 | fragin                     | NRP              | 37%        |
| Region 13 | redox-cofactor         | 4,788,138 | 4,810,303 | lankacidin C               | NRP + Polyketide | 13%        |
| Region 14 | lanthipeptide-class-ii | 5,124,605 | 5,147,679 |                            |                  |            |
| Region 15 | NRPS                   | 6,187,494 | 6,263,594 | pyoverdin                  | NRP              | 19%        |

***Pseudomonas bijeensis* Pf275 (CP031648.1) 15 regions**

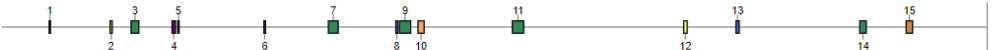

| Region    | Type                   | From      | To        | Most similar known cluster |                  | Similarity |
|-----------|------------------------|-----------|-----------|----------------------------|------------------|------------|
| Region 1  | RiPP-like              | 322,774   | 331,524   |                            |                  |            |
| Region 2  | NAGGN                  | 730,798   | 745,688   |                            |                  |            |
| Region 3  | NRPS                   | 871,654   | 923,725   | pyoverdin                  | NRP              | 10%        |
| Region 4  | betalactone            | 1,146,428 | 1,169,662 | fengycin                   | NRP              | 13%        |
| Region 5  | RiPP-like              | 1,184,534 | 1,193,819 |                            |                  |            |
| Region 6  | RiPP-like              | 1,762,091 | 1,772,936 |                            |                  |            |
| Region 7  | NRPS                   | 2,194,062 | 2,260,115 | entolysin                  | NRP              | 8%         |
| Region 8  | butyrolactone          | 2,646,084 | 2,659,503 |                            |                  |            |
| Region 9  | NRPS                   | 2,670,678 | 2,745,704 | crochelin A                | NRP + Polyketide | 7%         |
| Region 10 | T3PKS                  | 2,794,756 | 2,835,805 | 2,4-diacetylphloroglucinol | Polyketide       | 100%       |
| Region 11 | NRPS                   | 3,427,563 | 3,503,750 | pyoverdin                  | NRP              | 18%        |
| Region 12 | lanthipeptide-class-ii | 4,576,049 | 4,599,123 |                            |                  |            |
| Region 13 | redox-cofactor         | 4,926,002 | 4,948,167 | lankacidin C               | NRP + Polyketide | 13%        |
| Region 14 | NRPS-like              | 5,755,901 | 5,799,431 | fragin                     | NRP              | 37%        |
| Region 15 | arylpolyene            | 6,066,772 | 6,110,383 | APE Vf                     | Other            | 40%        |

***Pseudomonas bijieensis* DR133 (CP048607.1) 16 regions**



| Region      | Type                   | From      | To        | Most similar known cluster |                  | Similarity |
|-------------|------------------------|-----------|-----------|----------------------------|------------------|------------|
| Region 1.1  | RiPP-like              | 245,162   | 253,923   |                            |                  |            |
| Region 1.2  | ranthipeptide          | 756,554   | 777,984   | pyoverdin                  | NRP              | 8%         |
| Region 1.3  | RiPP-like              | 1,008,348 | 1,017,632 |                            |                  |            |
| Region 1.4  | betalactone            | 1,032,502 | 1,055,736 | fengycin                   | NRP              | 13%        |
| Region 1.5  | NRPS                   | 1,272,733 | 1,324,834 | pyoverdin                  | NRP              | 10%        |
| Region 1.6  | NAGGN                  | 1,453,510 | 1,468,400 |                            |                  |            |
| Region 1.7  | RiPP-like              | 1,864,933 | 1,875,802 |                            |                  |            |
| Region 1.8  | arylpolyene            | 2,688,468 | 2,732,079 | APE Vf                     | Other            | 40%        |
| Region 1.9  | NRPS-like              | 3,010,000 | 3,041,504 | fragin                     | NRP              | 37%        |
| Region 1.10 | redox-cofactor         | 3,847,813 | 3,869,978 | lankacidin C               | NRP + Polyketide | 13%        |
| Region 1.11 | lanthipeptide-class-ii | 4,183,262 | 4,206,336 |                            |                  |            |
| Region 1.12 | NRPS                   | 5,276,413 | 5,346,362 | pyoverdin                  | NRP              | 19%        |
| Region 1.13 | T3PKS                  | 5,878,549 | 5,919,598 | 2,4-diacetylphloroglucinol | Polyketide       | 100%       |
| Region 1.14 | NRPS                   | 5,968,688 | 6,043,948 | crochelin A                | NRP + Polyketide | 7%         |
| Region 1.15 | butyrolactone          | 6,063,932 | 6,077,351 |                            |                  |            |
| Region 1.16 | NRPS                   | 6,537,288 | 6,591,672 |                            |                  |            |

***Pseudomonas bijieensis* St290 (AP014703.1) 17 regions**

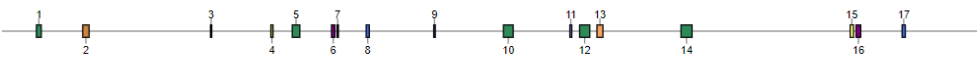

| Region    | Type                   | From      | To        | Most similar known cluster |                  | Similarity |
|-----------|------------------------|-----------|-----------|----------------------------|------------------|------------|
| Region 1  | NRPS-like              | 243,107   | 276,241   | fragin                     | NRP              | 37%        |
| Region 2  | arylpolyene            | 560,905   | 604,516   | APE Vf                     | Other            | 40%        |
| Region 3  | RiPP-like              | 1,437,793 | 1,446,538 |                            |                  |            |
| Region 4  | NAGGN                  | 1,852,340 | 1,867,230 |                            |                  |            |
| Region 5  | NRPS                   | 1,999,040 | 2,051,164 | pyoverdin                  | NRP              | 10%        |
| Region 6  | betalactone            | 2,268,644 | 2,291,878 | fengycin                   | NRP              | 13%        |
| Region 7  | RiPP-like              | 2,306,622 | 2,315,907 |                            |                  |            |
| Region 8  | redox-cofactor         | 2,506,526 | 2,528,070 |                            |                  |            |
| Region 9  | RiPP-like              | 2,970,190 | 2,981,035 |                            |                  |            |
| Region 10 | NRPS                   | 3,448,845 | 3,515,682 | syringomycin               | NRP              | 17%        |
| Region 11 | butyrolactone          | 3,904,593 | 3,918,012 |                            |                  |            |
| Region 12 | NRPS                   | 3,971,736 | 4,041,547 | crochelin A                | NRP + Polyketide | 7%         |
| Region 13 | T3PKS                  | 4,090,689 | 4,131,738 | 2,4-diacetylphloroglucinol | Polyketide       | 100%       |
| Region 14 | NRPS                   | 4,667,485 | 4,743,585 | pyoverdin                  | NRP              | 19%        |
| Region 15 | lanthipeptide-class-ii | 5,828,841 | 5,851,915 |                            |                  |            |
| Region 16 | terpene                | 5,869,669 | 5,901,378 | oxalomycin B               | NRP + Polyketide | 6%         |
| Region 17 | redox-cofactor         | 6,185,216 | 6,207,381 | lankacidin C               | NRP + Polyketide | 13%        |

***Pseudomonas bijieensis* 43MFCvi1.1 (QGDM00000000.1) 18 regions**

| Region      | Type                   | From    | To      | Most similar known cluster              |                  | Similarity |
|-------------|------------------------|---------|---------|-----------------------------------------|------------------|------------|
| Region 1.1  | NAGGN                  | 101,486 | 116,376 |                                         |                  |            |
| Region 1.2  | NRPS                   | 241,767 | 294,765 | pyoverdin                               | NRP              | 10%        |
| Region 1.3  | betalactone            | 511,731 | 534,965 | fengycin                                | NRP              | 13%        |
| Region 1.4  | RiPP-like              | 548,515 | 559,231 |                                         |                  |            |
| Region 2.1  | arylpolyene            | 271,121 | 314,732 | APE Vf                                  | Other            | 40%        |
| Region 4.1  | butyrolactone          | 180,262 | 193,681 |                                         |                  |            |
| Region 4.2  | NRPS                   | 203,563 | 279,366 | crochelin A                             | NRP + Polyketide | 7%         |
| Region 4.3  | T3PKS                  | 328,046 | 369,095 | 2,4-diacetylphloroglucinol              | Polyketide       | 100%       |
| Region 7.1  | NRPS                   | 79,965  | 147,371 | syringomycin                            | NRP              | 17%        |
| Region 9.1  | NRPS                   | 1       | 67,768  | pyoverdin                               | NRP              | 19%        |
| Region 11.1 | redox-cofactor         | 59,907  | 82,072  | lankacidin C                            | NRP + Polyketide | 13%        |
| Region 15.1 | RiPP-like              | 76,494  | 87,363  |                                         |                  |            |
| Region 18.1 | RiPP-like              | 124,294 | 135,139 |                                         |                  |            |
| Region 19.1 | terpene                | 13,538  | 45,160  | oxalomycin B                            | NRP + Polyketide | 6%         |
| Region 20.1 | lanthipeptide-class-ii | 85,331  | 108,405 |                                         |                  |            |
| Region 26.1 | ranthipeptide          | 3,287   | 24,717  | pyoverdin                               | NRP              | 8%         |
| Region 28.1 | NRPS-like              | 1       | 27,396  | fragin                                  | NRP              | 25%        |
| Region 32.1 | NRPS                   | 1       | 2,738   | rhizomide A / rhizomide B / rhizomide C | NRP              | 100%       |

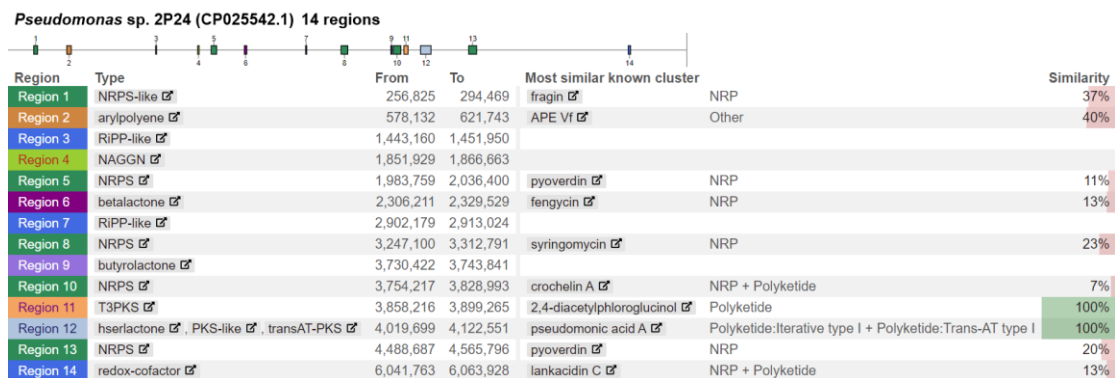

**Figure S1.** Compact view of gene clusters for biosynthesis of secondary metabolites identified by antiSMASH version 6.0 (<https://antismash.secondarymetabolites.org/>) using relaxed detection strictness from whole genome sequences of *Pseudomonas bijieensis* strains and the neighboring genomospecies strain *Pseudomonas* sp. 2P24.
